# Supplementary material for: Interaction Between the Sodium‐Glucose–Linked Transporter 2 Inhibitor Dapagliflozin and the Loop Diuretic Bumetanide in Normal Human Subjects
Source: PubMed Central journal article supplement — J Am Heart Assoc. 2018 Feb 10;7(4):e007046. doi: 10.1161/JAHA.117.007046 (PMC5850181; doi:10.1161/jaha.117.007046), 2018-02-10
Supplement: JAH3-7-e007046-s001.pdf [file JAH3-7-e007046-s001.pdf]

# **Supplemental Material**

**Table S1. Baseline characteristics of study subjects.**

---

| Parameter                          | Bumetanide  | Dapagliflozin | Bumetanide<br>plus dapagliflozin |
|------------------------------------|-------------|---------------|----------------------------------|
|                                    | (n = 14)    | (n = 14)      | (n = 14)                         |
| Age, years                         |             |               |                                  |
| Mean                               | 30 (7)      | 30 (7)        | 31 (7)                           |
| Men (n)                            | 11          | 10            | 11                               |
| Race (n)                           |             |               |                                  |
| White                              | 8           | 9             | 11                               |
| Black                              | 6           | 5             | 3                                |
| Body weight, kg                    |             |               |                                  |
| Mean                               | 79.7 (12.0) | 76.9 (13.9)   | 78.5 (10.6)                      |
| Body mass index, kg/m <sup>2</sup> |             |               |                                  |
| Mean                               | 26.9 (3.4)  | 26.3 (3.2)    | 26.3 (3.1)                       |

---

Mean ± standard deviation.

**Table S2. Pharmacokinetic parameters.**

|                                                      | <b>Bumetanide</b>                |                                                             | <b>Point estimate (90% CI)<br/>of ratio of adjusted<br/>geometric mean</b>     |
|------------------------------------------------------|----------------------------------|-------------------------------------------------------------|--------------------------------------------------------------------------------|
|                                                      | <b>Bumetanide<br/>(1 mg)</b>     | <b>Bumetanide (1 mg)<br/>plus dapagliflozin<br/>(10 mg)</b> |                                                                                |
| $C_{max}$ , adjusted<br>geometric mean, ng/ml        | 55.0 ± 3.1                       | 62.3 ± 3.6                                                  | 1.13 (0.98–1.31)                                                               |
| $AUC_{tau}$ , adjusted<br>geometric mean,<br>ng·h/ml | 121 ± 10                         | 138 ± 9                                                     | 1.13 (0.99–1.30)                                                               |
| Median $T_{max}$ , h (min,<br>max)                   | 1.50 (0.50, 2.00)                | 1.53 (0.50, 2.00)                                           |                                                                                |
| <b>Dapagliflozin</b>                                 |                                  |                                                             |                                                                                |
|                                                      | <b>Dapagliflozin<br/>(10 mg)</b> | <b>Dapagliflozin plus<br/>bumetanide (1mg)<br/>(10 mg)</b>  | <b>Point estimate (90%<br/>CI) of ratio of<br/>adjusted geometric<br/>mean</b> |
| $C_{max}$ , adjusted<br>geometric mean, ng/ml        | 192 ± 17                         | 208 ± 18                                                    | 1.08 (0.95–1.22)                                                               |
| $AUC_{tau}$ , adjusted<br>geometric mean,<br>ng·h/ml | 723 ± 39                         | 757 ± 37                                                    | 1.05 (0.99–1.11)                                                               |
| Median $T_{max}$ , h (min,<br>max)                   | 0.78 (0.75, 1.50)                | 0.75 (0.5, 4.00)                                            |                                                                                |
| Mean ± SEM values                                    |                                  |                                                             |                                                                                |

**Table S3. Blood pressure and heart rate.**

| <b>Parameter</b>                     | <b>Before (D1)</b> | <b>Dapagliflozin (D8)</b> | <b>Before (D1)</b> | <b>Bumetanide (D8)</b> | <b>Before (D1)</b> | <b>Dapagliflozin + Bumetanide (D8)</b> | <b>Dapagliflozin + Bumetanide (D14)</b> |
|--------------------------------------|--------------------|---------------------------|--------------------|------------------------|--------------------|----------------------------------------|-----------------------------------------|
| <b>Systolic BP (mmg)</b>             | <b>110 ± 3</b>     | <b>104 ± 3</b>            | <b>114 ± 3</b>     | <b>110 ± 4</b>         | <b>109 ± 3</b>     | <b>110 ± 3</b>                         | <b>112 ± 2</b>                          |
| <b>Diastolic BP (mmHg)</b>           | <b>72 ± 3</b>      | <b>72 ± 2</b>             | <b>74 ± 2</b>      | <b>75 ± 2</b>          | <b>73 ± 2</b>      | <b>75 ± 2</b>                          | <b>70 ± 2</b>                           |
| <b>Mean BP (mmHg)</b>                | <b>84 ± 2</b>      | <b>83 ± 3</b>             | <b>87 ± 2</b>      | <b>87 ± 2</b>          | <b>85 ± 2</b>      | <b>87 ± 2</b>                          | <b>84 ± 1</b>                           |
| <b>Heart rate (min<sup>-1</sup>)</b> | <b>65 ± 3</b>      | <b>78 ± 3*</b>            | <b>67 ± 4</b>      | <b>77 ± 4*</b>         | <b>62 ± 2</b>      | <b>77 ± 2***</b>                       | <b>77 ± 2***</b>                        |

**Mean ± SEM values (n-14 per group). Mean BP: Diastolic BP + 1/3 pulse pressure. Comparing D8 or D14 with D1: \*p<0.05; \*\*\*p<0.005**

**Table S4. Renal Excretion during First Day of Administration of Dapagliflozin and After One Week of Adaptation to Bumetanide.**

| Parameter (excretion)                      | Before (D-1) | Dapagliflozin Alone (D1) | Difference (D-1 to D1) | Before Bumetanide (D7) | Dapagliflozin Added to Bumetanide (D8) | Difference (D7 to D8) | Difference in Response to Dapagliflozin (D1 and D8) |
|--------------------------------------------|--------------|--------------------------|------------------------|------------------------|----------------------------------------|-----------------------|-----------------------------------------------------|
| Volume (ml·24 h <sup>-1</sup> )            | 2127<br>±264 | 2928<br>±516             | +800 *<br>±327*        | 2071<br>±232           | 2757<br>±247                           | +686<br>±120***       | NS                                                  |
| Osmoles (osm·kg <sup>-1</sup> )            | 248<br>±22   | 325<br>±36               | +78<br>±26*            | 254<br>±18             | 314<br>±22                             | +60<br>±17***         | NS                                                  |
| Glucose (g·24 h <sup>-1</sup> )            | 0.1<br>±0.01 | 37.1<br>±2.9             | +37.0<br>±2.9***       | 0<br>±0.01             | 31.3<br>±2.9                           | +31.3<br>± 2.9***     | NS                                                  |
| Na <sup>+</sup> (mmol·24 h <sup>-1</sup> ) | 65<br>±5     | 87<br>±8                 | +22<br>±6***           | 81<br>±4               | 146<br>±6                              | +64<br>±6***          | P<0.005                                             |
| K <sup>+</sup> (mmol·24 h <sup>-1</sup> )  | 43<br>±3     | 62<br>±4                 | +19<br>±3***           | 67<br>±5               | 69<br>±4                               | +3<br>±4              | NS                                                  |
| Urate (mg·24 h <sup>-1</sup> )             | 415<br>±22   | 626<br>±38               | +210<br>±23***         | 306<br>±27             | 567<br>±41                             | +261<br>±24***        | NS                                                  |

Mean ± SEM values during the day before, and the first day of administration of dapagliflozin (10 mg) on day 1 (D1), or day 8 D (D8) when given on a background of 8 days of bumetanide (1mg) administration.

Compared to before:

\*, p<0.05; \*\*, p<0.01; \*\*\*, p<0.005

**Table S5. Renal Excretion during First Day of Administration of Bumetanide and After One Week of Adaptation to Dapagliflozin.**

| Parameter (excretion)                      | Before (D-1) | Bumetanide Alone (D1) | Difference( D-1 to D1) | Dapagliflozin (D7) | Bumetanide Added to Dapagliflozin (D8) | Difference (D7 to D8) | Difference in Response to Bumetanide (D1 to D8) |
|--------------------------------------------|--------------|-----------------------|------------------------|--------------------|----------------------------------------|-----------------------|-------------------------------------------------|
| Volume (ml·24 h <sup>-1</sup> )            | 2687<br>±344 | 3510<br>+1-395        | +823<br>±294*          | 2344<br>+391       | 3339<br>±528                           | +995<br>±217***       | NS                                              |
| Osmoles (osm·kg <sup>-1</sup> )            | 224<br>±29   | 221<br>±21            | -4<br>±24              | 358<br>±31         | 331<br>±43                             | -27<br>±46            | P<0.05                                          |
| Glucose (g·24 hr <sup>-1</sup> )           | 0.1<br>±0.01 | 0.1<br>±0.001         | 0<br>± 0.01            | 29.5<br>±2.9       | 27.0<br>±2.9                           | -2.4<br>±1.4          | P<0.005                                         |
| Na <sup>+</sup> (mmol·24 h <sup>-1</sup> ) | 70<br>±8     | 143<br>±9             | +74<br>±7***           | 60<br>±4           | 195<br>±6                              | +101<br>±8***         | P<0.05                                          |
| K <sup>+</sup> (mmol·24 h <sup>-1</sup> )  | 47<br>±4     | 69<br>±6              | +21<br>±5***           | 60<br>±4           | 71<br>±5                               | +11<br>±5*            | NS                                              |
| Urate (mg·24 h <sup>-1</sup> )             | 406<br>±19   | 336<br>±24            | -66<br>±30*            | 404<br>±25         | 397<br>±55                             | -7<br>±60             | NS                                              |

Mean ± SEM values during the day before (D-1), and the first day (D1) of administration of bumetanide (1 mg) on day 1 (D1) or day 8 (D8) when given on a background of 8 days of dapagliflozin (10mg) administration. Compared to before:

\*, p<0.05; \*\*, p<0.01; \*\*\*, p<0.005

**Table S6. Renal Excretion during First Day of Administration of Dapagliflozin + Bumetanide and After One Week of Adaptation to the Combined Diuretics.**

| Parameter<br>(excretion)                      | Before (D-1) | Both<br>Diuretics<br>Together<br>(D1) | Difference<br>(D-1 to D1) | Before<br>Second<br>Week of<br>combined<br>therapy<br>(D7) | Both<br>Diuretics<br>Together<br>(D8) | Difference<br>(D7 to D8) | Difference in<br>Response to<br>Diuretic<br>(D1 to D8) |
|-----------------------------------------------|--------------|---------------------------------------|---------------------------|------------------------------------------------------------|---------------------------------------|--------------------------|--------------------------------------------------------|
| Volume<br>(ml·24 h <sup>-1</sup> )            | 2317<br>±234 | 3504<br>±357                          | +1187<br>±297***          | 2861<br>±318                                               | 2882<br>±376                          | +21<br>±123              | -622<br>±321<br>NS                                     |
| Osmoles<br>(osm·kg <sup>-1</sup> )            | 250<br>±27   | 279<br>±25                            | +17<br>±23                | 295<br>±33                                                 | 302<br>±29                            | +7<br>±24                | NS                                                     |
| Glucose<br>(g·24 hr <sup>-1</sup> )           | 0.1<br>±0.05 | 27.1<br>±2.6                          | +27<br>±3***              | 21.8<br>±3.3                                               | 21.8<br>±3.0                          | 0<br>±2                  | -5.1<br>±2.1                                           |
| Na <sup>+</sup><br>(mmol·24 h <sup>-1</sup> ) | 66<br>±7     | 150<br>±11                            | +80<br>±5***              | 95<br>±4                                                   | 111<br>±5                             | +16<br>±7*               | -43<br>±11***                                          |
| K <sup>+</sup><br>(mmol·24 h <sup>-1</sup> )  | 56<br>±3     | 75<br>±6                              | +20<br>±5***              | 76<br>±5                                                   | 69<br>±5                              | -7<br>±3                 | -5<br>±4<br>NS                                         |
| Urate<br>(mg·24 h <sup>-1</sup> )             | 424<br>±23   | 522<br>±55                            | +87<br>±51                | 392<br>±28                                                 | 368<br>±29                            | -25<br>±18               | -139<br>±48*                                           |

Mean ± SEM values during the day before (D-1), or day of (D1) the first day of administration of bumetanide (1 mg) plus dapagliflozin (10 mg) and at the beginning of the second week (D7 and D8) of combined therapy. Compared to before: \*, p<0.05; \*\*, p<0.01; \*\*\*, p<0.005

**Table S7. Summary of adverse events.**

| Number of events (%)                                     | Bumetanide             |                           |                                    | All subjects<br>(n = 42) |
|----------------------------------------------------------|------------------------|---------------------------|------------------------------------|--------------------------|
|                                                          | Bumetanide<br>(n = 14) | Dapagliflozin<br>(n = 14) | plus<br>dapagliflozin*<br>(n = 41) |                          |
| Subjects with an<br>adverse event                        | 6 (43)                 | 7 (50)                    | 22 (54)                            | 29 (69)                  |
| Total adverse events                                     | 23                     | 13                        | 50                                 | 81                       |
| <b>Most common adverse events (&gt;10% in any group)</b> |                        |                           |                                    |                          |
| Abdominal pain                                           | 4 (29)                 | 3 (21)                    | 3 (7)                              | 10 (24)                  |
| Nausea                                                   | 3 (21)                 | 2 (14)                    | 7 (17)                             | 10 (24)                  |
| Vomiting                                                 | 2 (14)                 | 1 (7)                     | 1 (2)                              | 4 (10)                   |
| Asthenia                                                 | 4 (29)                 | 2 (14)                    | 5 (12)                             | 10 (24)                  |
| Headache                                                 | 2 (14)                 | 1 (7)                     | 4 (10)                             | 7 (17)                   |
| Dizziness                                                | 1 (7)                  | 1 (7)                     | 5 (12)                             | 6 (14)                   |

\*Includes all subjects who received bumetanide plus dapagliflozin at any time during the study.

Number (%)



Figure S1. Daily glucose excretion and serum glucose concentration.

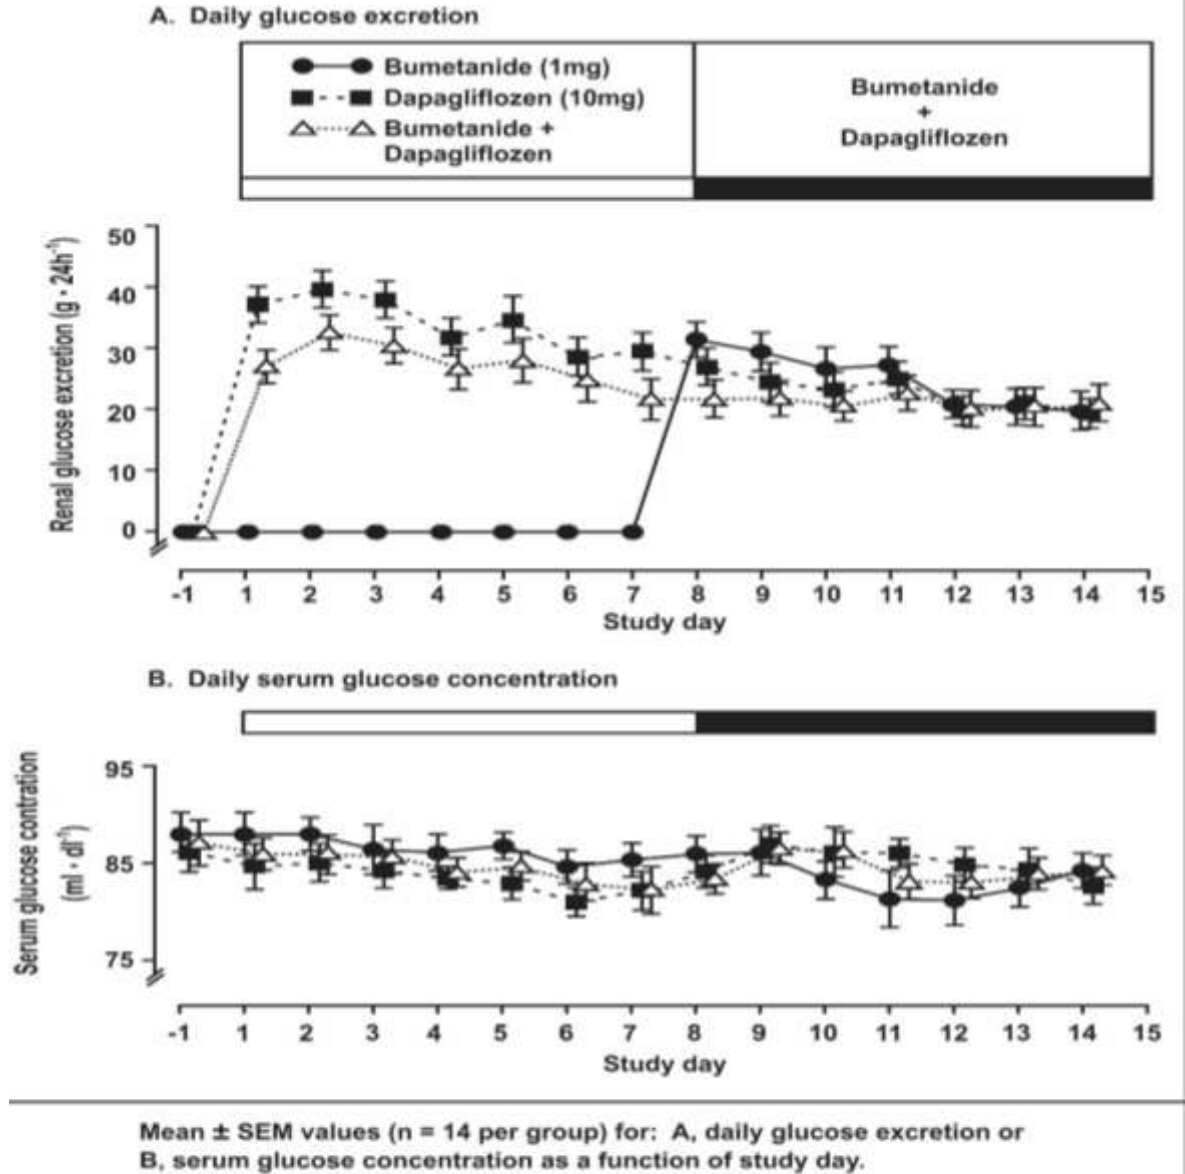

Figure S2. Daily Potassium excretion and serum potassium concentration.

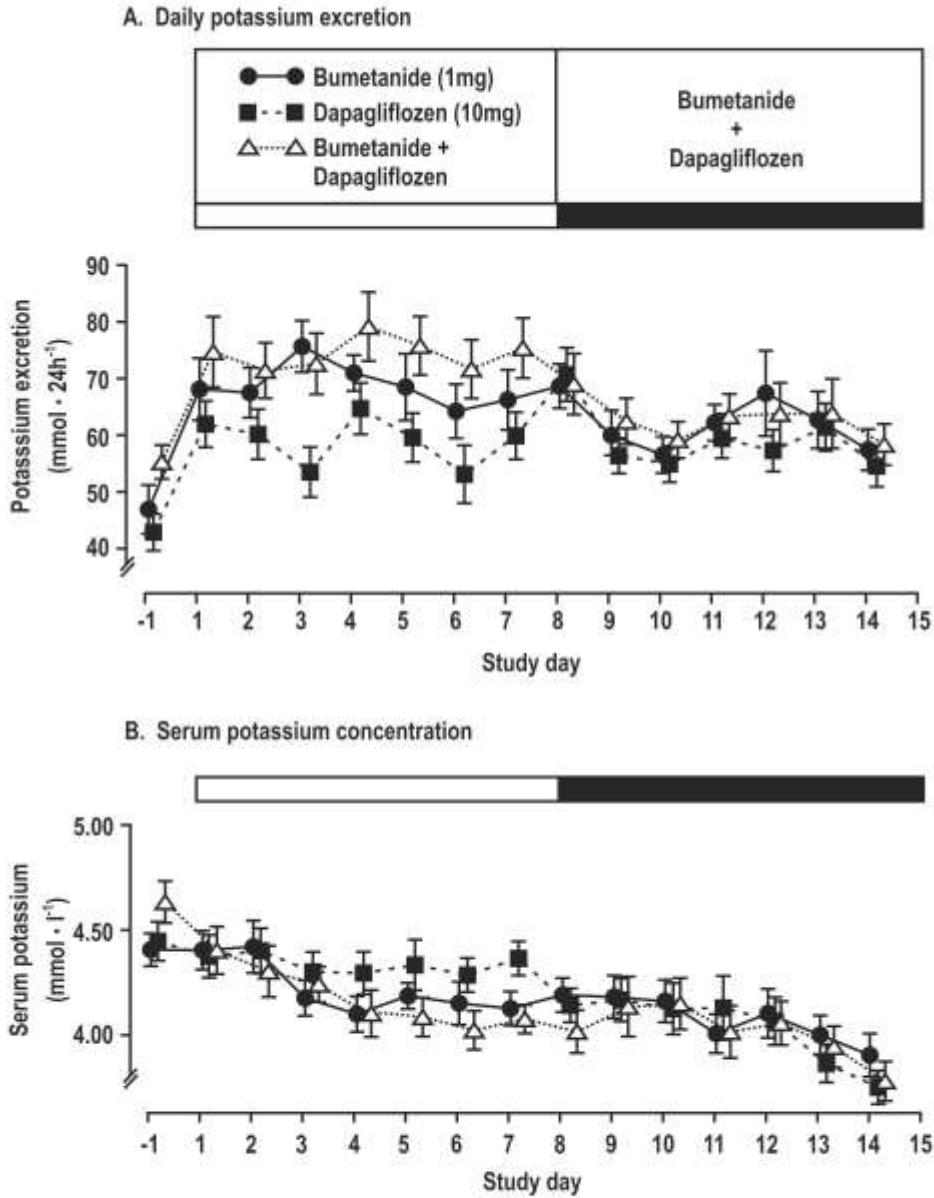

Mean  $\pm$  SEM values (n = 14 per group) for: A, potassium excretion and B, serum potassium concentration

**Figure S3. Daily Urate Excretion, Serum Urate Concentration and Renal Urate Clearance.**

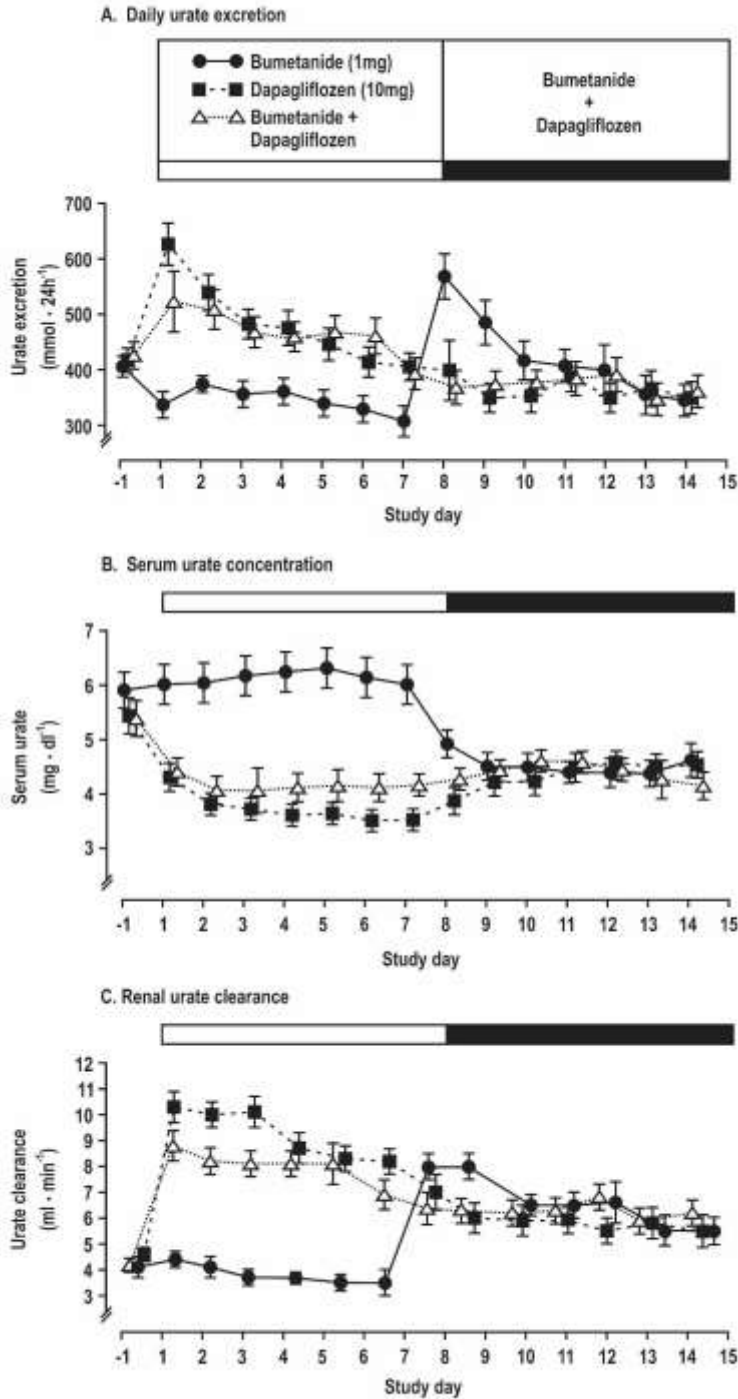

Mean  $\pm$  SEM values ( $n = 14$  per group) for: A, urate excretion; B, serum urate concentration and C, renal urate clearance as a function of study day

Figure S4. Daily Calcium and Magnesium Excretion.

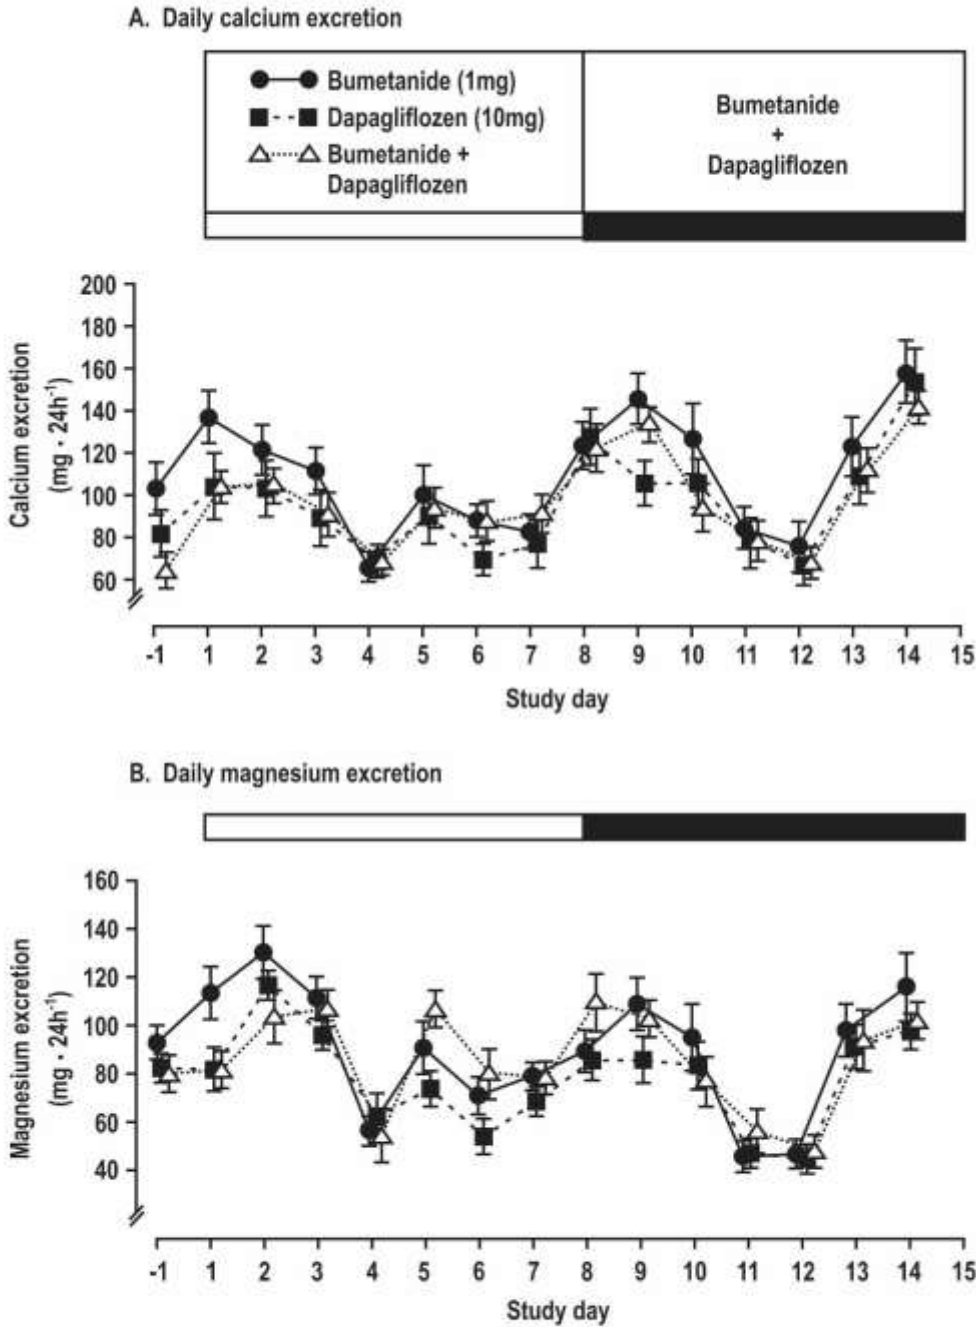

Mean  $\pm$  SEM values ( $n = 14$  per group) for: A, calcium excretion and B, magnesium excretion as a function of study day

Figure S5. Creatinine Clearance.

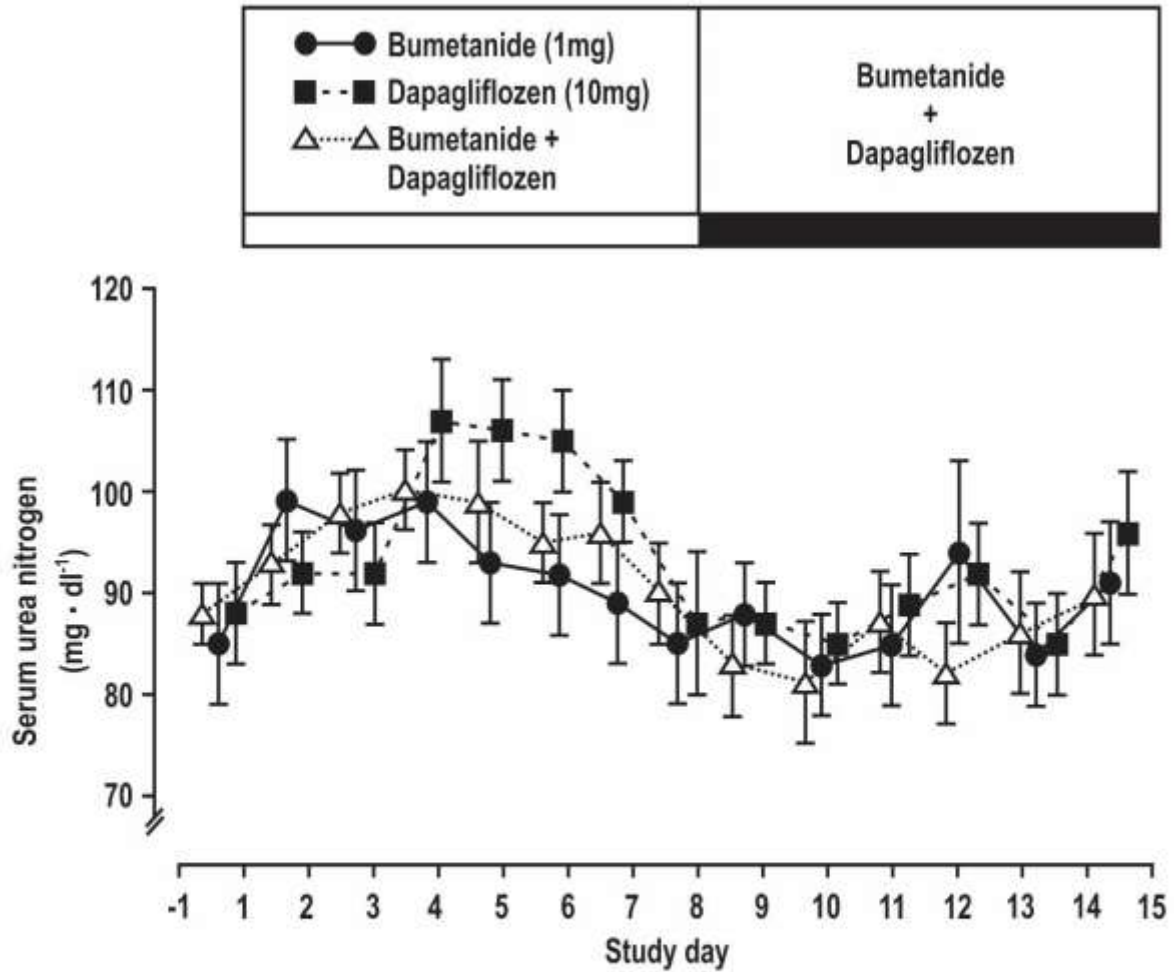

Mean  $\pm$  SEM values (n = 14 per group) for creatinine clearance as a function of study day

Figure S6. Plasma Retin Activity.

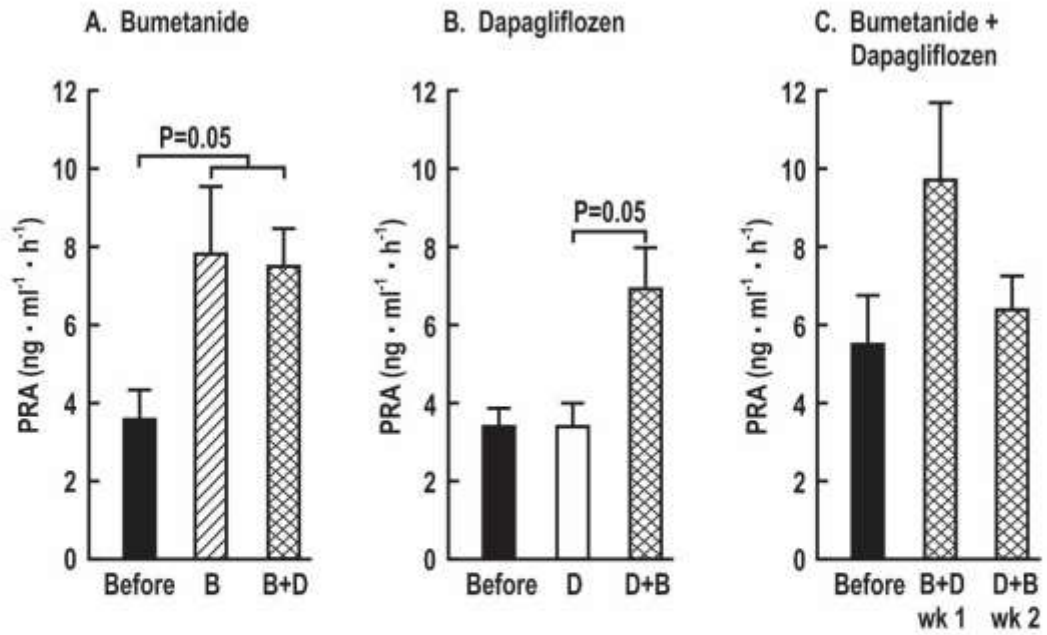

Mean  $\pm$  SEM values (n = 14 per group)

- Before
- ▨ One week of bumetanide (1mg daily)
- One week of dapagliflozen (10mg daily)
- ▩ One or two weeks of bumetanide + dapagliflozen
